# Supplementary material for: Novel Gemini cationic lipids with carbamate groups for gene delivery
Source: Royal Society of Chemistry journal article supplement (doi:10.1039/c3tb21506g), 2014-01-01
Supplement: c3tb21506g1.pdf [file c3tb21506g1.pdf]

## Supplementary Information

### 1. The synthesis of mono-head quaternary ammoniums

Scheme 1. Synthesis of Cationic Lipids (M12-M18). Reaction Conditions: (A) CH<sub>2</sub>Cl<sub>2</sub>, 40 °C, 3 h; (B) THF, 40 °C, 3 h; (C) 120 ~160 °C, 40 h.

5

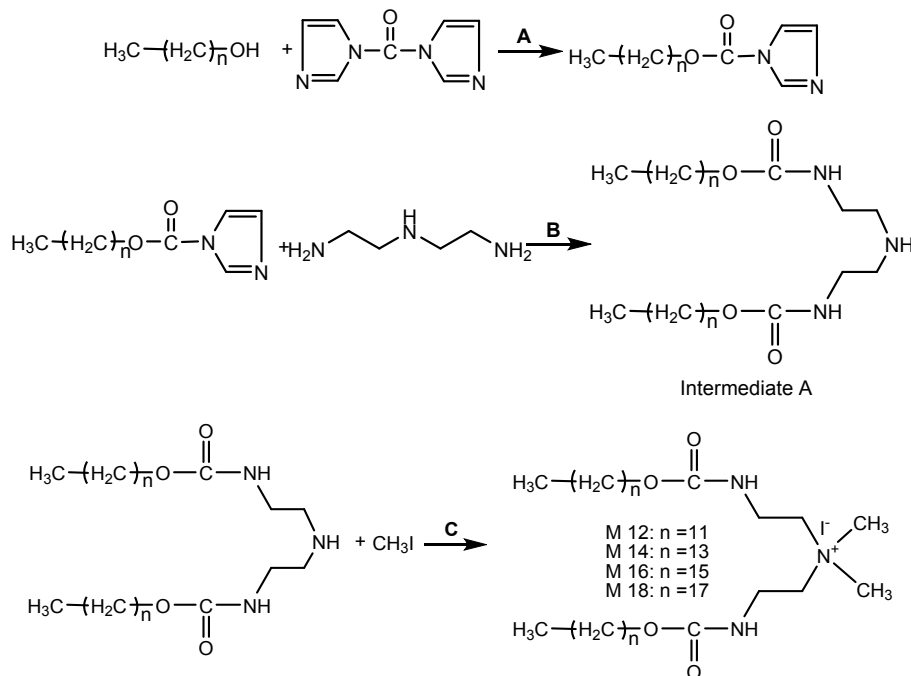

### 2. The Characterization of lipids

#### 2.1. M12

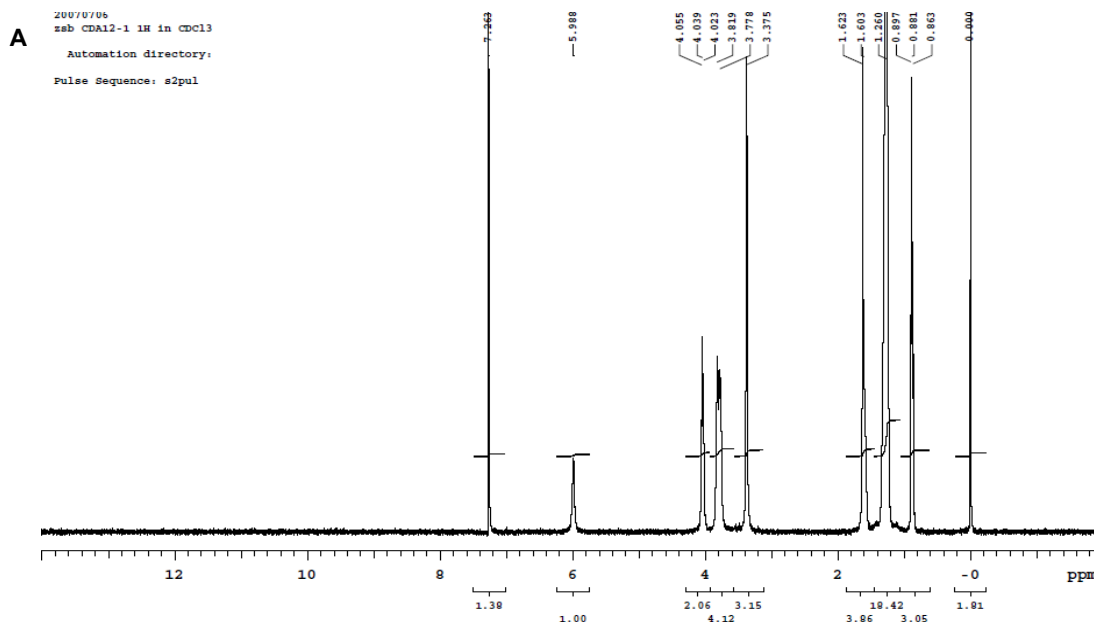

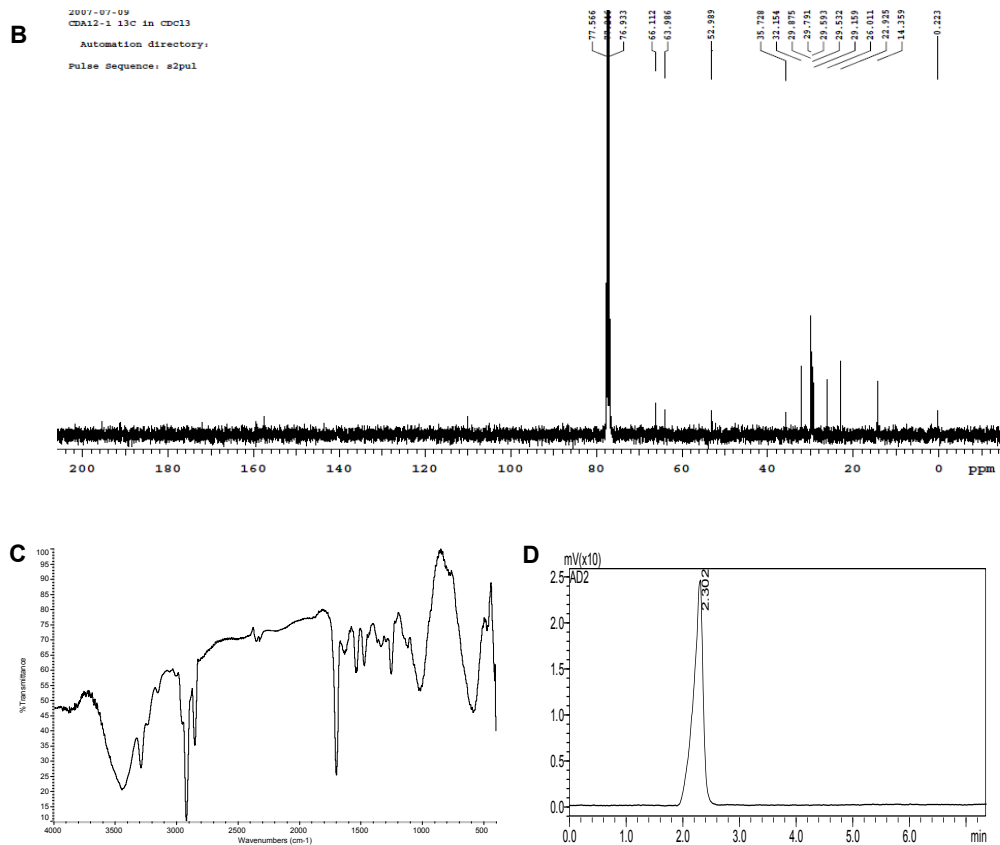

Fig. 1. Structure characterization of M12, A:  $^1\text{H}$  NMR; B:  $^{13}\text{C}$  NMR; C: IR; D: HPLC

Data assignment:  $^1\text{H}$  NMR (400MHz,  $\text{CDCl}_3$ )  $\delta$ =6.00(2H, s,  $\text{O}(\text{C}=\text{O})\text{NH}$ ), 4.05 (4H, t,  $\text{CH}_2\text{O}$ ), 3.82 (8H, s,  $\text{NHCH}_2\text{CH}_2\text{N}^+$ ), 5 3.36 (6H, s,  $\text{N}^+\text{CH}_3$ ), 1.59 (4H, s,  $\text{CH}_2\text{CH}_2\text{O}$ ), 1.28~1.20 (36H, s,  $(\text{CH}_2)_9$ ), 0.89~0.86 (6H, t,  $\text{CH}_2\text{CH}_3$ ).  $^{13}\text{C}$  NMR (100MHz,  $\text{CDCl}_3$ )  $\delta$ =157.3 ( $\text{C}=\text{O}$ ), 66.0 ( $\text{CH}_2\text{O}$ ), 63.9 ( $\text{CH}_2\text{N}^+$ ), 52.9 ( $\text{CH}_3\text{N}^+$ ), 35.6 ( $\text{NHCH}_2$ ), 32.1 ( $\text{CH}_2\text{CH}_2\text{CH}_3$ ), 29.7~29.1 ( $(\text{CH}_2)_6$ ;  $\text{CH}_2\text{CH}_2\text{O}$ ), 25.9 ( $\text{CH}_2\text{CH}_2\text{CH}_2\text{O}$ ), 22.8 ( $\text{CH}_2\text{CH}_3$ ), 14.3 ( $\text{CH}_3$ ). MS  $m/z$ : 556.5074  $[\text{M}-\text{I}]^+$  (Calc, 556.5053). IR  $\nu/\text{cm}^{-1}$ : 3282.49 ( $\nu_{\text{NH}}$ ), 1698.16 ( $\nu_{\text{C}=\text{O}}$ ), 1536.41 ( $\delta_{\text{NH}}$ ), 1250-1235 ( $\nu_{\text{COC}}$ ,  $\nu_{\text{CN}}$ ). HPLC purity: 99.5 %.

## 2.2. M14

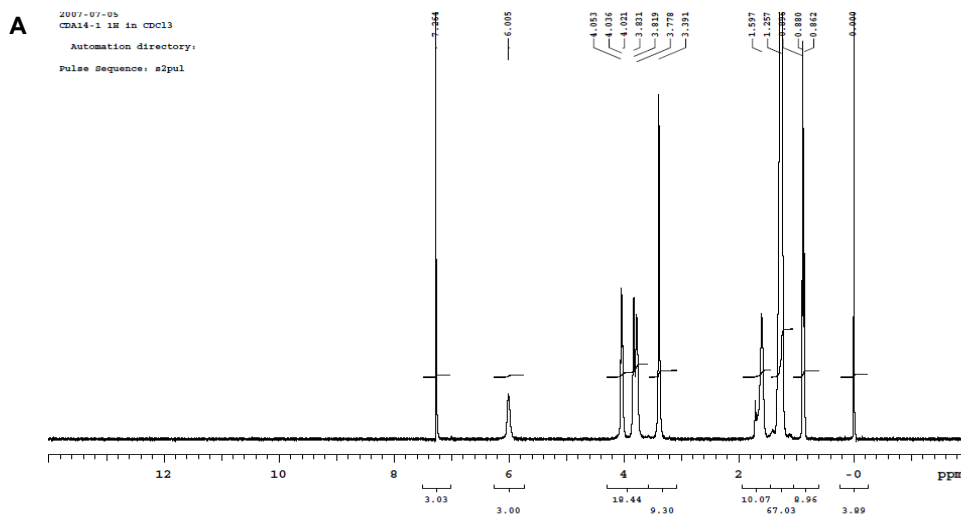

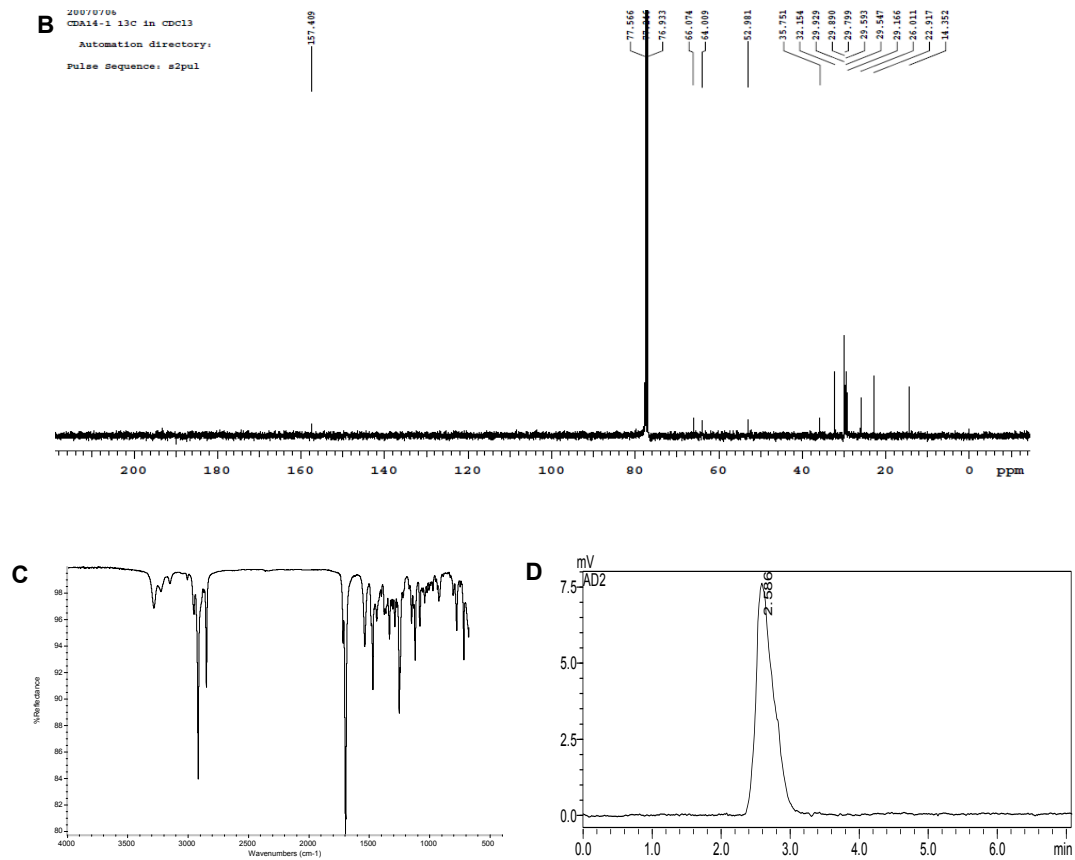

Fig. 2. Structure characterization of M14, A:  $^1\text{H}$  NMR; B:  $^{13}\text{C}$  NMR; C: IR; D: HPLC

Data assignment:  $^1\text{H}$  NMR (400MHz,  $\text{CDCl}_3$ )  $\delta$ =6.02 (2H, s,  $\text{O}(\text{C}=\text{O})\text{NH}$ ), 4.04 (4H, t,  $\text{CH}_2\text{O}$ ), 3.82 (8H, s, 5  $\text{NHCH}_2\text{CH}_2\text{N}^+$ ), 3.38 (6H, s,  $\text{N}^+\text{CH}_3$ ), 1.59 (4H, s,  $\text{CH}_2\text{CH}_2\text{O}$ ), 1.25~1.21 (44H, s,  $(\text{CH}_2)_{11}$ ), 0.89~0.86 (6H, t,  $\text{CH}_2\text{CH}_3$ ).  $^{13}\text{C}$  NMR (100MHz,  $\text{CDCl}_3$ )  $\delta$ =157.4 ( $\text{C}=\text{O}$ ), 66.1 ( $\text{CH}_2\text{O}$ ), 64.0 ( $\text{CH}_2\text{N}^+$ ), 52.9 ( $\text{CH}_3\text{N}^+$ ), 35.7 ( $\text{NHCH}_2$ ), 32.1 ( $\text{CH}_2\text{CH}_2\text{CH}_3$ ), 29.9~29.2 ( $(\text{CH}_2)_8$ ;  $\text{CH}_2\text{CH}_2\text{O}$ ), 26.0 ( $\text{CH}_2\text{CH}_2\text{CH}_2\text{O}$ ), 22.9 ( $\text{CH}_2\text{CH}_3$ ), 14.4 ( $\text{CH}_3$ ). MS  $m/z$ : 612.5680 [ $\text{M}-\text{I}$ ] $^+$  (Calc, 612.5679). IR  $\text{v}/\text{cm}^{-1}$ : 3283.15 ( $\text{v}_{\text{NH}}$ ), 1698.21 ( $\text{v}_{\text{C}=\text{O}}$ ), 1537.55 ( $\delta_{\text{NH}}$ ), 1256-1240 ( $\text{v}_{\text{COC}}$ ,  $\text{v}_{\text{CN}}$ ). HPLC purity: 99.2 %.

### 10 2.3. M16

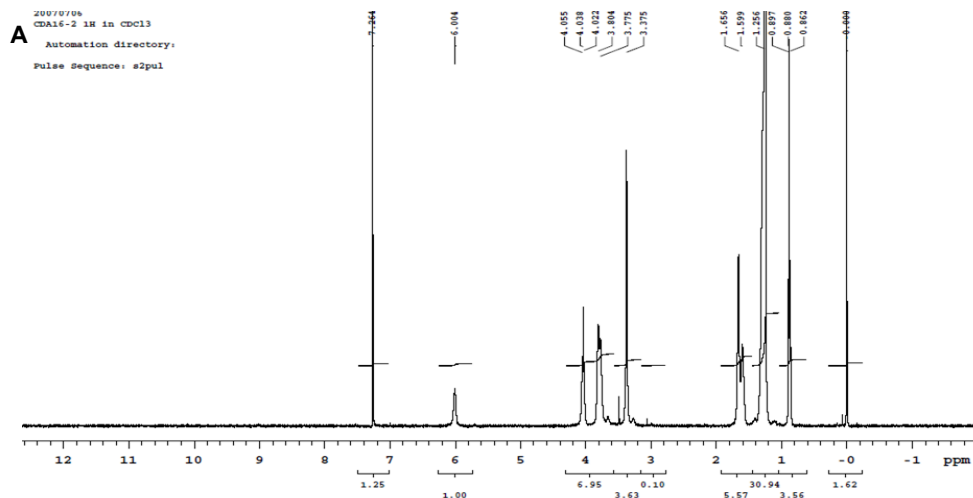

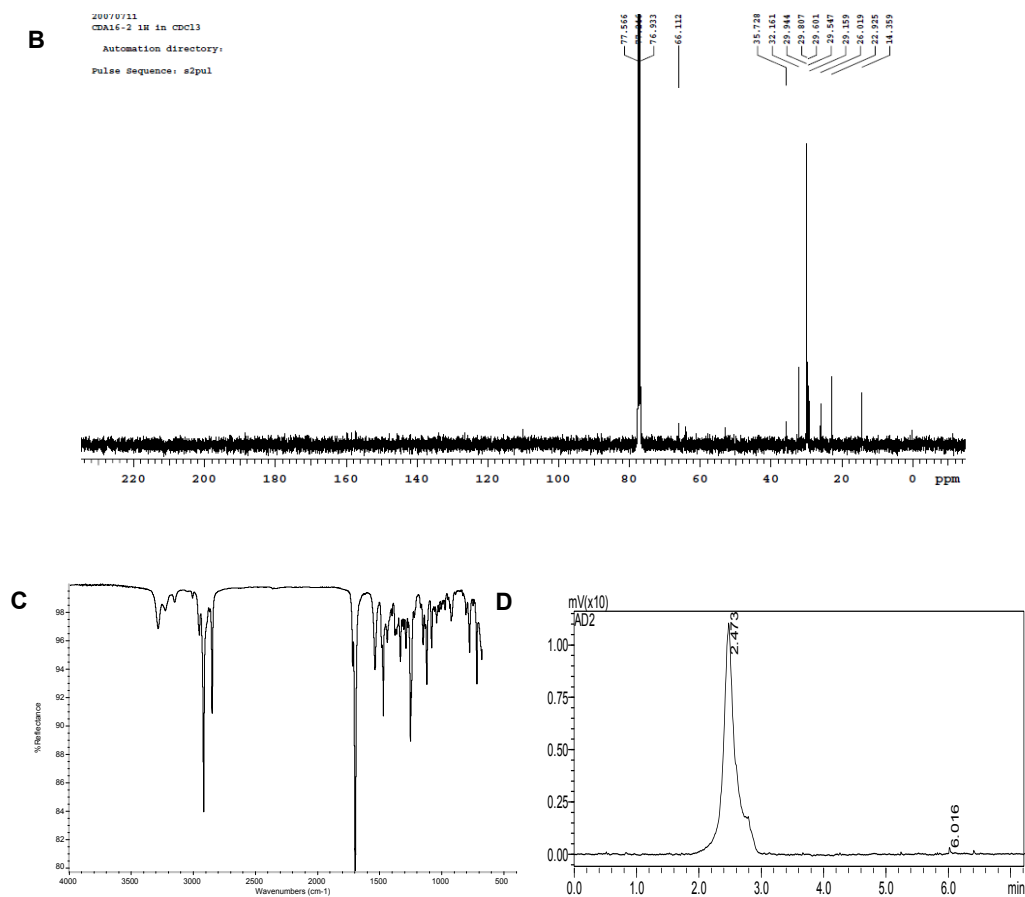

Fig. 3. Structure characterization of M16, A:  $^1\text{H}$  NMR; B:  $^{13}\text{C}$  NMR; C: IR; D: HPLC

Data assignment:  $^1\text{H}$  NMR (400MHz,  $\text{CDCl}_3$ )  $\delta$ =6.01 (2H, s,  $\text{O}(\text{C}=\text{O})\text{NH}$ ), 4.06 (4H, t,  $\text{CH}_2\text{O}$ ), 3.80 (8H, s, 5  $\text{NHCH}_2\text{CH}_2\text{N}^+$ ), 3.38 (6H, s,  $\text{N}^+\text{CH}_3$ ), 1.60(4H, s,  $\text{CH}_2\text{CH}_2\text{O}$ ), 1.26 (52H, s,  $(\text{CH}_2)_{13}$ ), 0.89 ~0.86 (6H, t,  $\text{CH}_2\text{CH}_3$ ).  $^{13}\text{C}$  NMR (100MHz,  $\text{CDCl}_3$ )  $\delta$ =157.4 ( $\text{C}=\text{O}$ ), 66.0 ( $\text{CH}_2\text{O}$ ), 63.9 ( $\text{CH}_2\text{N}^+$ ), 52.9 ( $\text{CH}_3\text{N}^+$ ), 35.6 ( $\text{NHCH}_2$ ), 32.1 ( $\text{CH}_2\text{CH}_2\text{CH}_3$ ), 29.8~29.1 ( $(\text{CH}_2)_{10}$ ;  $\text{CH}_2\text{CH}_2\text{O}$ ), 25.9 ( $\text{CH}_2\text{CH}_2\text{CH}_2\text{O}$ ), 22.8 ( $\text{CH}_2\text{CH}_3$ ), 14.2 ( $\text{CH}_3$ ). MS  $m/z$ : 668.6324 [ $\text{M}-\text{I}$ ] $^+$  (Calc, 668.6305). IR  $\nu/\text{cm}^{-1}$ : 3290.78 ( $\nu_{\text{NH}}$ ), 1689.86 ( $\nu_{\text{C}=\text{O}}$ ), 1540.55 ( $\delta_{\text{NH}}$ ), 1254-1240 ( $\nu_{\text{COC}}$ ,  $\nu_{\text{CN}}$ ). HPLC purity: 98.6 %.

#### 2.4. M18

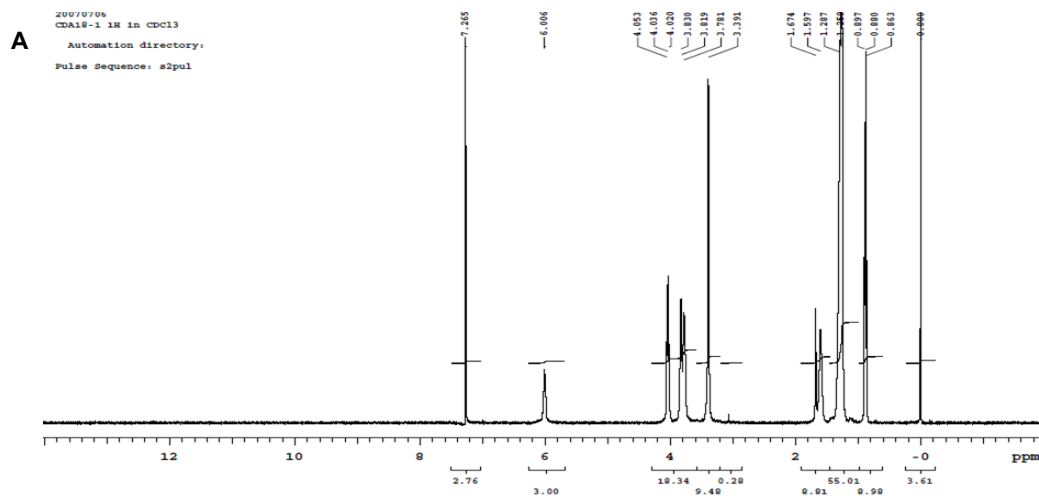

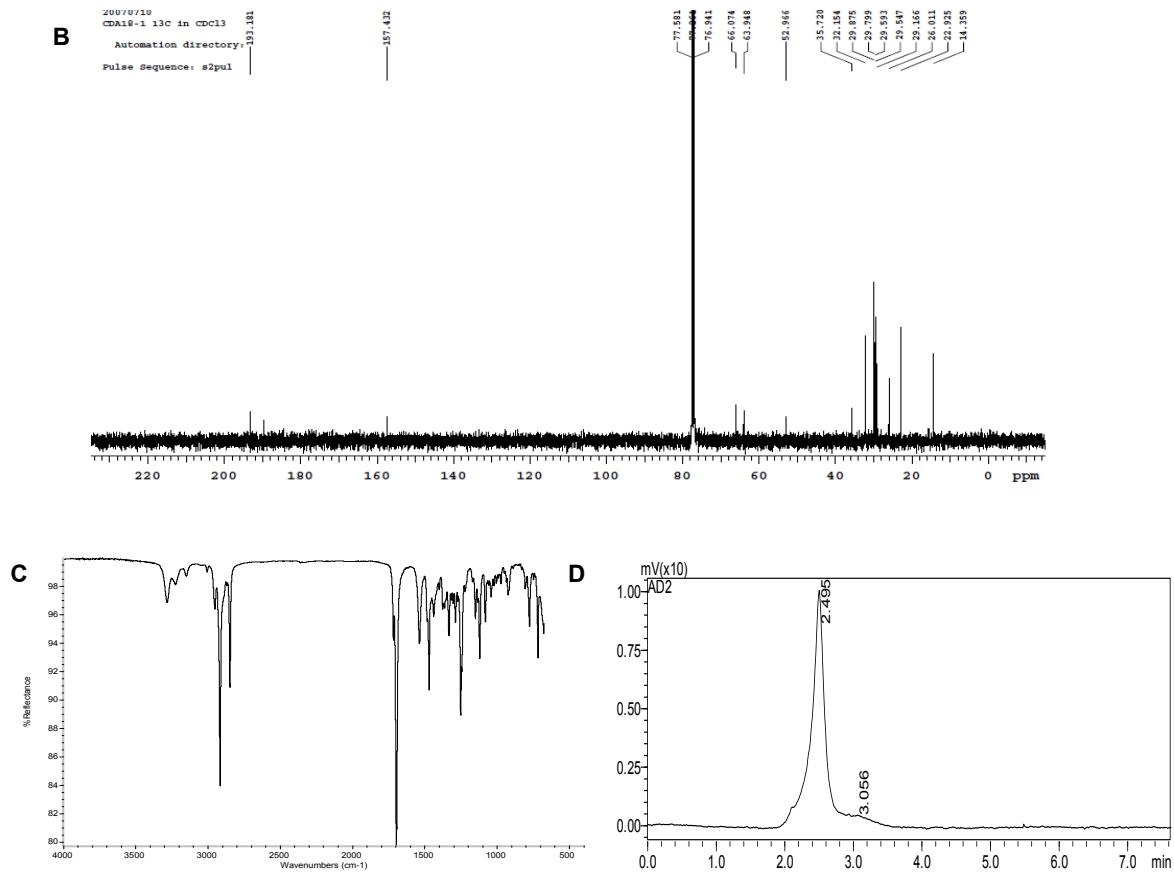

Fig. 4. Structure characterization of M18, A: <sup>1</sup>H NMR; B: <sup>13</sup>C NMR; C: IR; D: HPLC

Data assignment: <sup>1</sup>H NMR (400MHz, CDCl<sub>3</sub>) δ=6.01 (2H, s, O(C=O)NH), 4.05(4H, t, CH<sub>2</sub>O), 3.83 (8H, s, NHCH<sub>2</sub>CH<sub>2</sub>N<sup>+</sup>), 5 3.39 (6H, s, N<sup>+</sup>CH<sub>3</sub>), 1.59 (4H, s, CH<sub>2</sub>CH<sub>2</sub>O), 1.28~1.26 (60H, s, (CH<sub>2</sub>)<sub>15</sub>), 0.89~0.86 (6H, t, CH<sub>2</sub>CH<sub>3</sub>). <sup>13</sup>C NMR (100MHz, CDCl<sub>3</sub>) δ=157.3 (C=O), 65.9 (CH<sub>2</sub>O), 63.8 (CH<sub>2</sub>N<sup>+</sup>), 52.8 (CH<sub>3</sub>N<sup>+</sup>), 35.6 (NHCH<sub>2</sub>), 32.1 (CH<sub>2</sub>CH<sub>2</sub>CH<sub>3</sub>), 29.8~29.1 ((CH<sub>2</sub>)<sub>12</sub>, CH<sub>2</sub>CH<sub>2</sub>O), 25.9 (CH<sub>2</sub>CH<sub>2</sub>CH<sub>2</sub>O), 22.8 (CH<sub>2</sub>CH<sub>3</sub>), 14.3 (CH<sub>3</sub>). MS *m/z*: 724.6964 [M-I]<sup>+</sup> (Calc, 724.6931). IR ν/cm<sup>-1</sup>: 3290.78 (ν<sub>NH</sub>), 1698.16 (ν<sub>C=O</sub>), 1544.70 (δ<sub>NH</sub>), 1254-1230 (ν<sub>COC</sub>, ν<sub>CN</sub>). HPLC purity: 98.5%.

### 2.5. G12

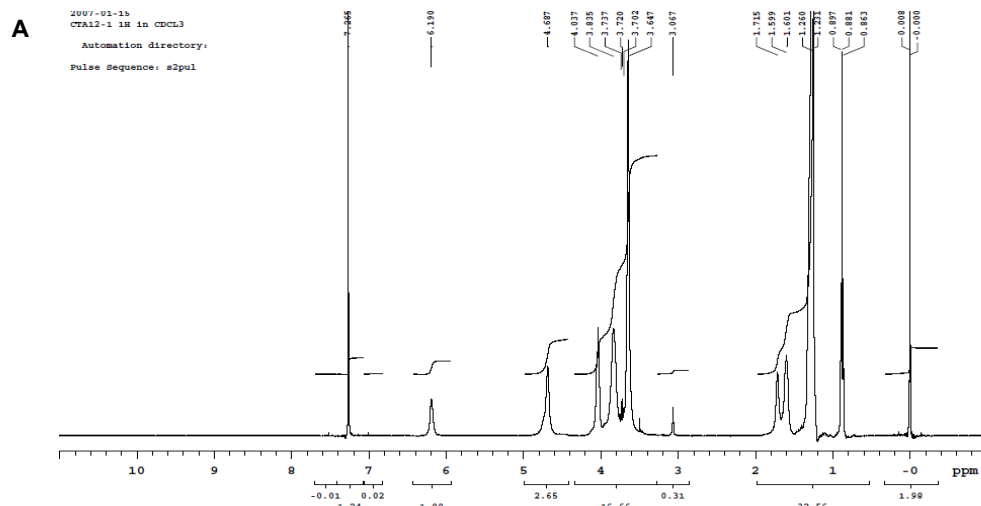

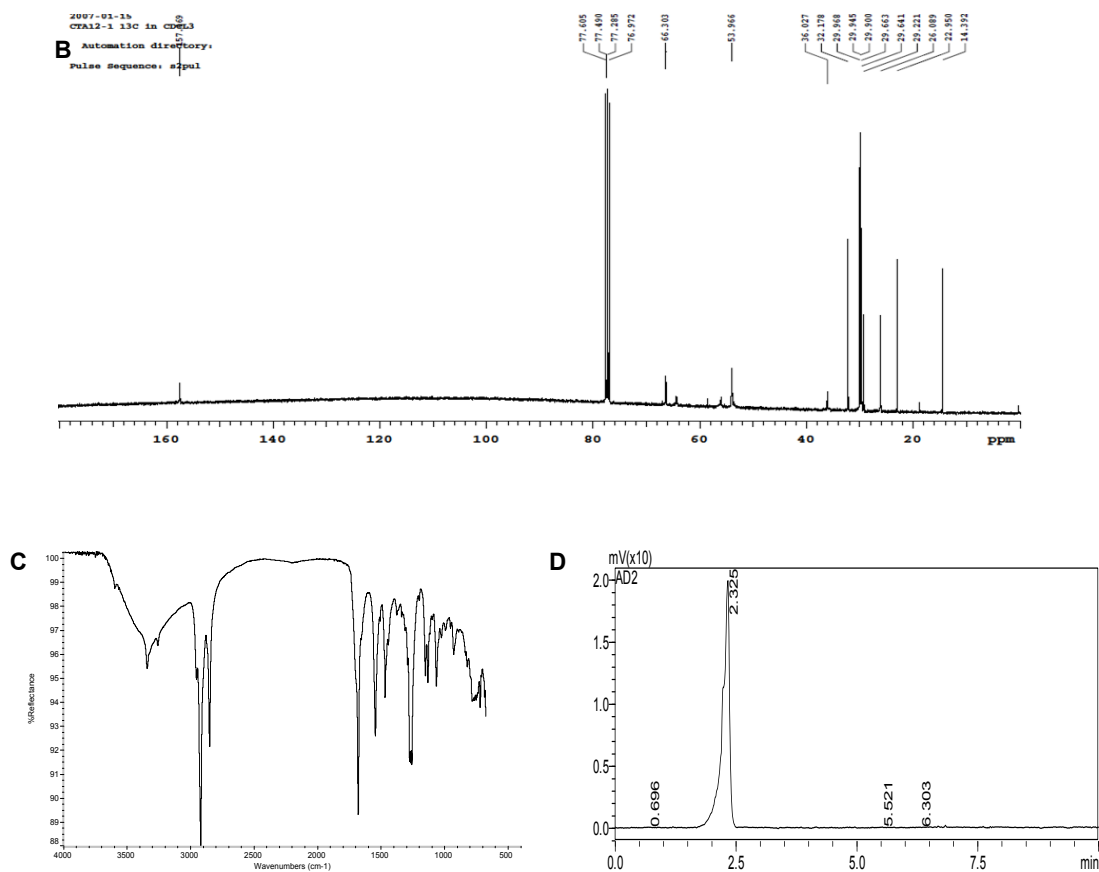

Fig. 5. Structure characterization of G12, A:  $^1\text{H}$  NMR; B:  $^{13}\text{C}$  NMR; C: IR; D: HPLC

Data assignment:  $^1\text{H}$  NMR (400MHz,  $\text{CDCl}_3$ )  $\delta$  = 6.19 (2H, s,  $\text{O}(\text{C}=\text{O})\text{NH}$ ), 4.68 (4H, s,  $\text{N}^+\text{CH}_2\text{CH}_2\text{N}^+$ ), 4.03 (4H, t, 5  $\text{CH}_2\text{O}$ ), 3.83 (8H, s,  $\text{NHCH}_2\text{CH}_2\text{N}^+$ ), 3.72 (12H, s,  $\text{CH}_3\text{N}^+$ ), 1.71 (4H, s,  $\text{CH}_2\text{CH}_2\text{O}$ ), 1.59 (4H, s,  $\text{CH}_2\text{CH}_2\text{CH}_2\text{O}$ ), 1.28~1.23 (32H, s,  $(\text{CH}_2)_8$ ), 0.89~0.86 (6H, t,  $\text{CH}_2\text{CH}_3$ ).  $^{13}\text{C}$  NMR (100MHz,  $\text{CDCl}_3$ )  $\delta$  = 157.4 ( $\text{C}=\text{O}$ ), 66.3 ( $\text{CH}_2\text{O}$ ), 64.4 ( $\text{CH}_2\text{N}^+$ ), 55.9 ( $\text{N}^+\text{CH}_2\text{CH}_2\text{N}^+$ ), 53.9 ( $\text{CH}_3\text{N}^+$ ), 36.0 ( $\text{NHCH}_2$ ), 32.2 ( $\text{CH}_2\text{CH}_2\text{CH}_3$ ), 29.9~29.2 ( $(\text{CH}_2)_6$ ;  $\text{CH}_2\text{CH}_2\text{O}$ ), 26.1 ( $\text{CH}_2\text{CH}_2\text{CH}_2\text{O}$ ), 22.9 ( $\text{CH}_2\text{CH}_3$ ), 14.4 ( $\text{CH}_3$ ). MS  $m/z$ : 755.4941 [ $\text{M}-\text{I}$ ] $^+$  (Calc, 755.4911). IR  $\nu/\text{cm}^{-1}$ : 3303.23 ( $\nu_{\text{NH}}$ ), 1685.71 ( $\nu_{\text{C}=\text{O}}$ ), 1544.70 ( $\delta_{\text{NH}}$ ), 1250-1230 ( $\nu_{\text{COC}}$ ,  $\nu_{\text{CN}}$ ). HPLC purity: 98.5 %.

### 10 2.6. G14

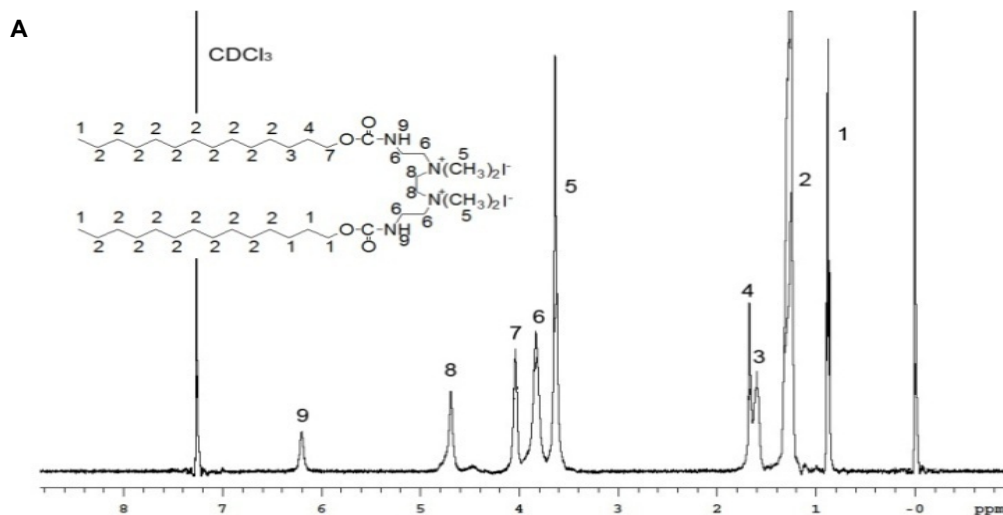

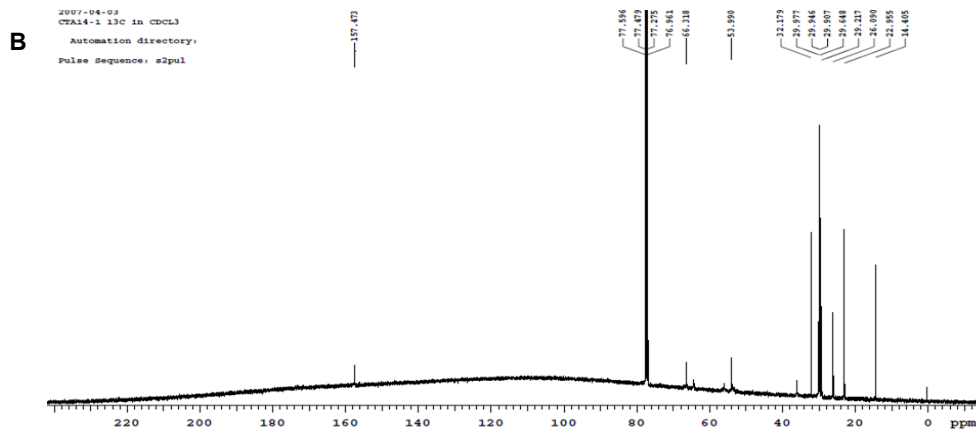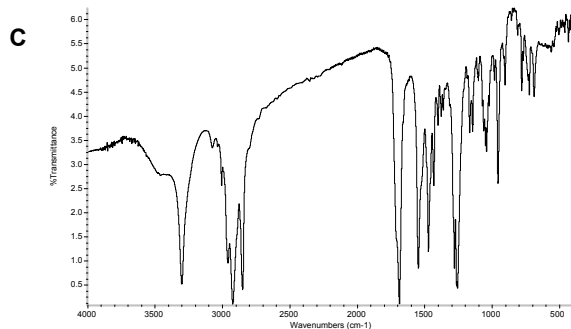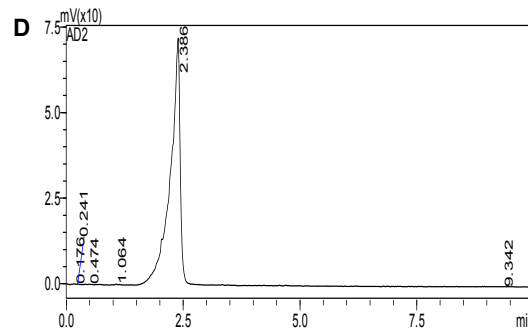

5

10

Fig. 6. Structure characterization of G14, A:  $^1\text{H}$  NMR; B:  $^{13}\text{C}$  NMR; C: IR; D: HPLC

Data assignment:  $^1\text{H}$  NMR (400MHz,  $\text{CDCl}_3$ )  $\delta$ =6.19 (2H, s, O (C=O)  $\text{NH}$ ), 4.69 (4H, s,  $\text{N}^+\text{CH}_2\text{CH}_2\text{N}^+$ ), 4.04 (4H, t,  $\text{CH}_2\text{O}$ ), 3.83 (8H, s,  $\text{NHCH}_2\text{CH}_2\text{N}^+$ ), 3.64 (12H, s,  $\text{CH}_3\text{N}^+$ ), 1.67 (4H, s,  $\text{CH}_2\text{CH}_2\text{O}$ ), 1.60 (4H, s,  $2\text{CH}_2\text{CH}_2\text{CH}_2\text{O}$ ), 1.26 (40H, s,  $(\text{CH}_2)_{10}$ ), 0.89~0.86 (6H, t,  $\text{CH}_2\text{CH}_3$ ).  $^{13}\text{C}$  NMR (100MHz,  $\text{CDCl}_3$ )  $\delta$ =157.5 (C=O), 66.3 ( $\text{CH}_2\text{O}$ ), 64.3 15 ( $\text{NHCH}_2\text{CH}_2\text{N}^+$ ), 55.9 ( $\text{N}^+\text{CH}_2\text{CH}_2\text{N}^+$ ), 53.9 ( $\text{CH}_3\text{N}^+$ ), 36.0 ( $\text{NHCH}_2$ ), 32.2 ( $\text{CH}_2\text{CH}_2\text{CH}_3$ ), 29.9~26.2 ( $(\text{CH}_2)_8$ ;  $\text{CH}_2\text{CH}_2\text{O}$ ), 26.1 ( $\text{CH}_2\text{CH}_2\text{CH}_2\text{O}$ ), 22.9 ( $\text{CH}_2\text{CH}_3$ ), 14.4 ( $\text{CH}_3$ ). MS  $m/z$ : 811.5563  $[\text{M-I}]^+$  (Calc, 811.5537) and 342.3250  $[\text{M-I}]^{2+}/2$  (Calc, 342.3246). IR  $\text{v}/\text{cm}^{-1}$ : 3299.08 ( $\nu_{\text{NH}}$ ), 1681.57 ( $\nu_{\text{C=O}}$ ), 1548.85 ( $\delta_{\text{NH}}$ ), 1250-1230 ( $\nu_{\text{COC}}$ ,  $\nu_{\text{CN}}$ ). HPLC purity: 99.3 %.

### 2.7. G16

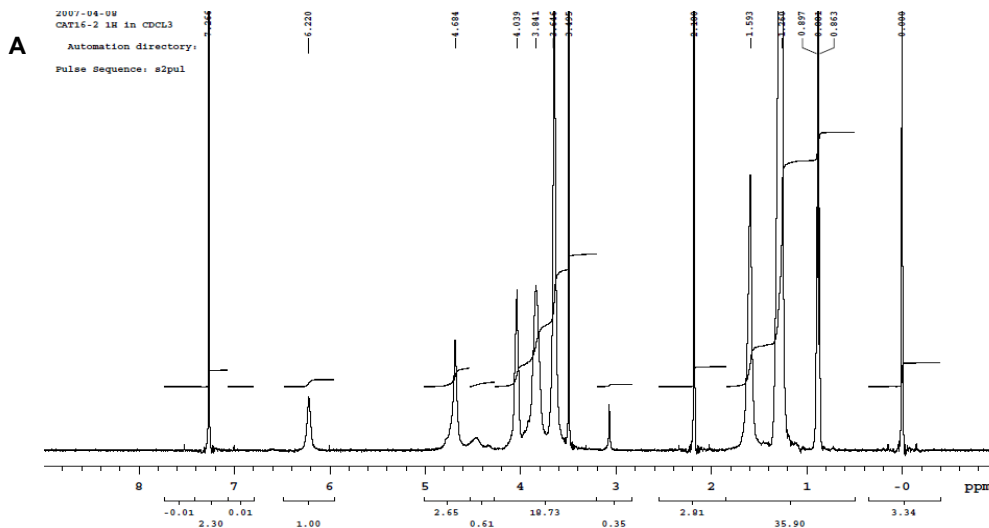

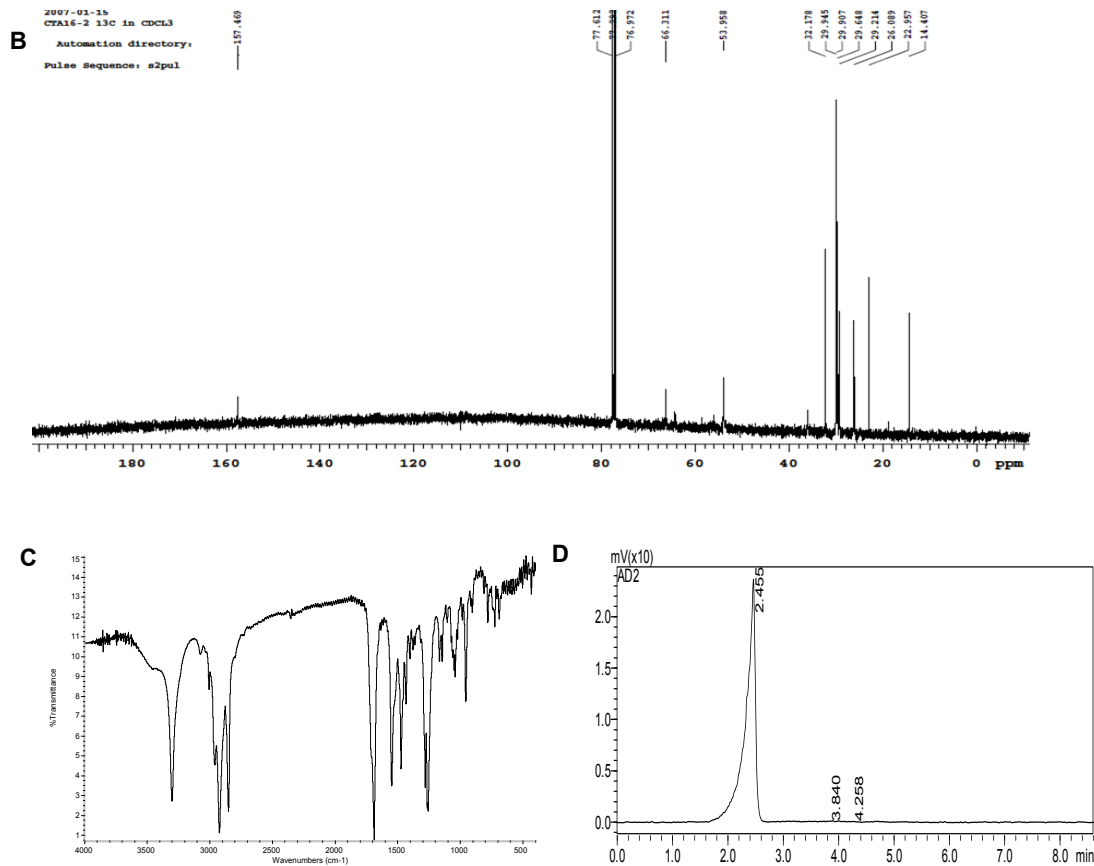

Fig. 7. Structure characterization of G16, A:  $^1\text{H}$  NMR; B:  $^{13}\text{C}$  NMR; C: IR; D: HPLC

Data assignment:  $^1\text{H}$  NMR (400MHz,  $\text{CDCl}_3$ )  $\delta$ =6.22 (2H, s,  $\text{O}(\text{C}=\text{O})\text{NH}$ ), 4.68(4H, s,  $\text{N}^+\text{CH}_2\text{CH}_2\text{N}^+$ ), 4.04 (4H, s,  $\text{CH}_2\text{O}$ ), 5 3.83 (8H, s,  $\text{NHCH}_2\text{CH}_2\text{N}^+$ ), 3.64 (12H, s,  $\text{CH}_3\text{N}^+$ ), 1.59 (4H, s,  $\text{CH}_2\text{CH}_2\text{O}$ ), 1.26 (48H, s,  $(\text{CH}_2)_{12}$ ), 0.89~0.86 (6H, t,  $\text{CH}_2\text{CH}_3$ ).  $^{13}\text{C}$  NMR (100MHz,  $\text{CDCl}_3$ )  $\delta$ =157.3 ( $\text{C}=\text{O}$ ), 66.2 ( $\text{CH}_2\text{O}$ ), 64.3 ( $\text{NHCH}_2\text{CH}_2\text{N}^+$ ), 55.9 ( $\text{N}^+\text{CH}_2\text{CH}_2\text{N}^+$ ), 53.8 ( $\text{CH}_3\text{N}^+$ ), 36.0 ( $\text{NHCH}_2$ ), 32.0 ( $\text{CH}_2\text{CH}_2\text{CH}_3$ ), 29.8~29.1 ( $(\text{CH}_2)_{10}$ ;  $\text{CH}_2\text{CH}_2\text{O}$ ), 25.9( $\text{CH}_2\text{CH}_2\text{CH}_2\text{O}$ ), 22.8 ( $\text{CH}_2\text{CH}_3$ ), 14.3 ( $\text{CH}_3$ ). MS  $m/z$ : 867.6172 [ $\text{M}-\text{I}$ ] $^+$  (Calc, 867.6163) and 370.3546 [ $\text{M}-\text{I}$ ] $^{2+}/2$  (Calc, 370.3559). IR  $\nu/\text{cm}^{-1}$ : 3265.90 ( $\nu_{\text{NH}}$ ), 1706.45 ( $\nu_{\text{C}=\text{O}}$ ), 1523.96 ( $\delta_{\text{NH}}$ ), 1250-1230 ( $\nu_{\text{COC}}$ ,  $\nu_{\text{CN}}$ ). HPLC purity: 99.1 %.

### 10 2.8. G18

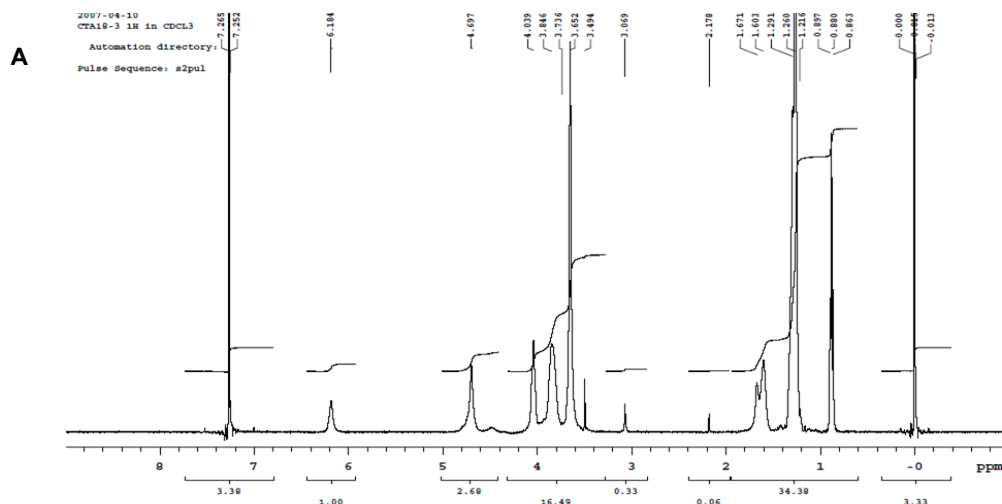



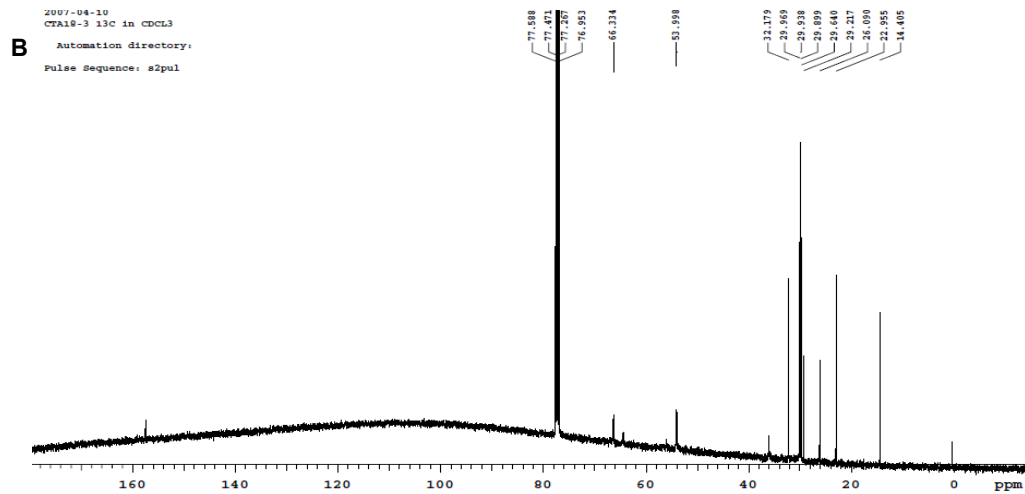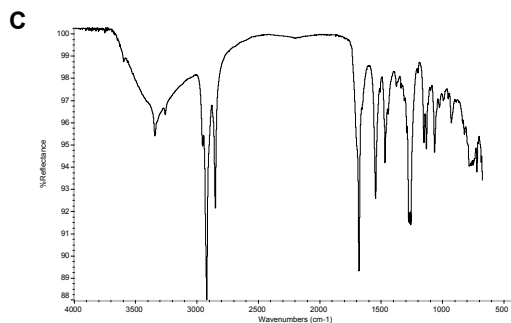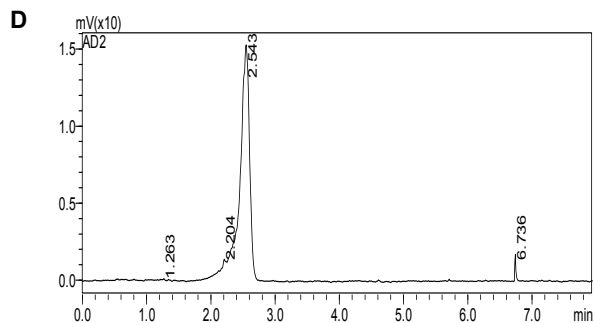

Fig. 8. Structure characterization of G18, A:  $^1\text{H}$  NMR; B:  $^{13}\text{C}$  NMR; C: IR; D: HPLC

Data assignment:  $^1\text{H}$  NMR (400MHz,  $\text{CDCl}_3$ )  $\delta$ = 6.18 (2H, s,  $\text{O}(\text{C}=\text{O})\text{NH}$ ), 4.69 (4H, s,  $\text{N}^+\text{CH}_2\text{CH}_2\text{N}^+$ ), 4.04 (4H, s, 5  $\text{CH}_2\text{O}$ ), 3.84 (8H, s,  $\text{NHCH}_2\text{CH}_2\text{N}^+$ ), 3.65 (12H, s,  $\text{CH}_3\text{N}^+$ ), 1.67 (4H, s,  $\text{CH}_2\text{CH}_2\text{O}$ ), 1.60 (4H, s,  $\text{CH}_2\text{CH}_2\text{CH}_2\text{O}$ ), 1.29~1.22 (56H, s,  $(\text{CH}_2)_{14}$ ), 0.89~0.86 (6H, t,  $\text{CH}_2\text{CH}_3$ ).  $^{13}\text{C}$  NMR (100MHz,  $\text{CDCl}_3$ )  $\delta$ =157.6 ( $\text{C}=\text{O}$ ), 66.3 ( $\text{CH}_2\text{O}$ ), 64.3 ( $\text{NHCH}_2\text{CH}_2\text{N}^+$ ), 55.9 ( $\text{N}^+\text{CH}_2\text{CH}_2\text{N}^+$ ), 53.9 ( $\text{CH}_3\text{N}^+$ ), 36.0 ( $\text{NHCH}_2$ ), 32.2 ( $\text{CH}_2\text{CH}_2\text{CH}_3$ ), 29.9~29.2 ( $(\text{CH}_2)_{12}$ ;  $\text{CH}_2\text{CH}_2\text{O}$ ), 22.5 ( $\text{CH}_2\text{CH}_3$ ), 14.4 ( $\text{CH}_3$ ). MS  $m/z$ : 923.6747 [ $\text{M}-\text{I}$ ] $^+$  (Calc, 923.6789). IR  $\nu/\text{cm}^{-1}$ : 3365.44 ( $\nu_{\text{NH}}$ ), 1718.85 ( $\nu_{\text{C}=\text{O}}$ ), 1523.96 ( $\delta_{\text{NH}}$ ), 1254-1240 ( $\nu_{\text{COC}}$ ,  $\nu_{\text{CN}}$ ). HPLC purity: 98.4 %.

10

15

### 3. Lipoplex formation confirmed by gel electrophoresis

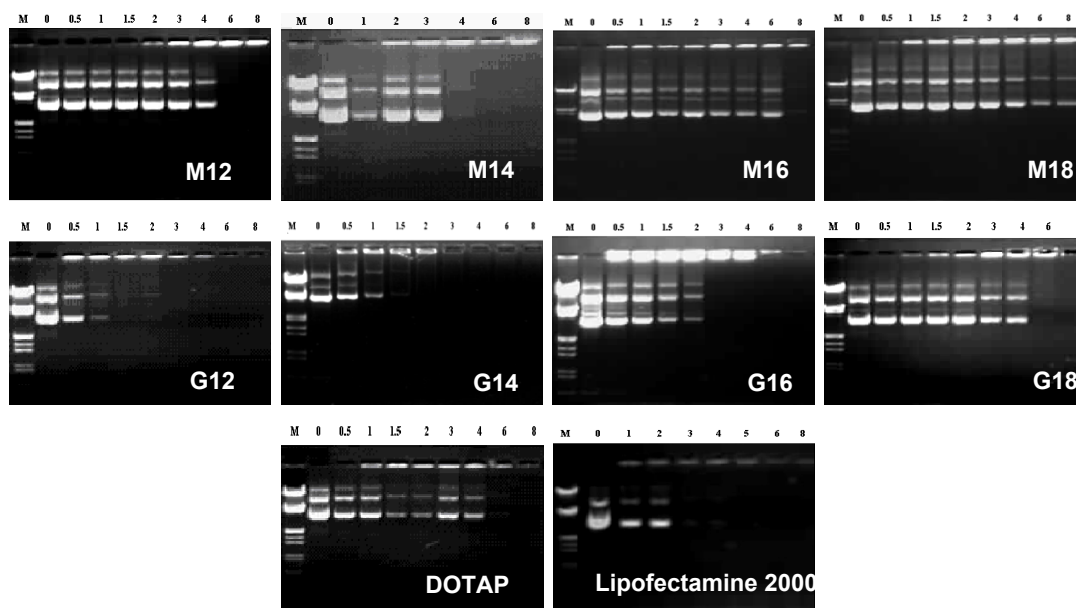

5 Fig. 9. Complex formation of liposomes/pGFP-N2 at various charge ratios, determined by gel electrophoresis using 1.0% agarose in tris-acetate running buffer. Lane 1: marker ( $\lambda$  DNA/*EcoR* I + *Hind* III Markers from SABC); lane 2: naked pDNA (0.2  $\mu$ g); lanes 3-10 pDNA (0.2  $\mu$ g) with N/P ratios of 0.5, 1, 1.5, 2, 3, 4, 6 and 8. For M14 lanes 3-8 correspond to ratios of 1, 2, 3, 4, 6 and 8; for Lipofectamine 2000, lanes 3-9 correspond to ratios of 1, 2, 3, 4, 5, 6, and 8.

### 4. Particle size, and $\zeta$ -potential of M14

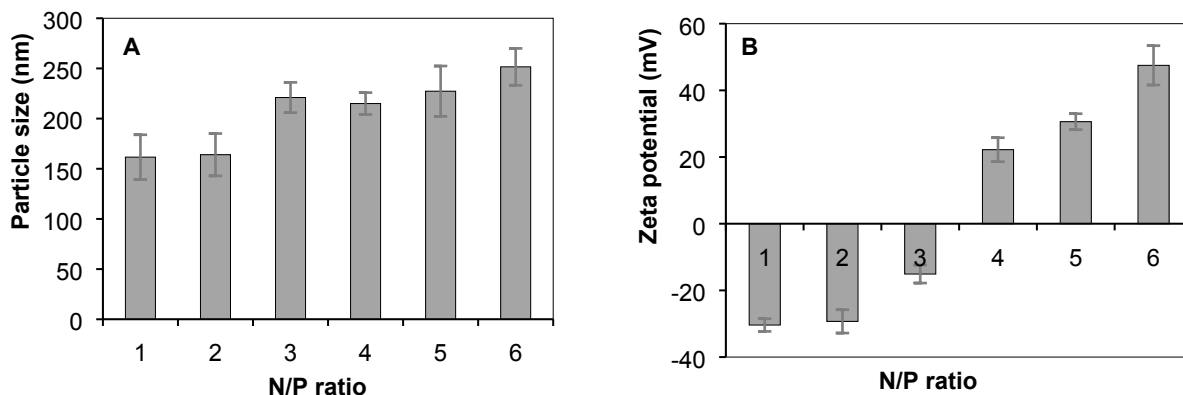

10

Fig. 10. Zeta potential and particle size of M14 lipoplexes at different N/P weight ratios. Lipoplexes (20  $\mu$ L) were diluted in 1 mL distilled water. Zeta potential (A) and particle size (B) were measured using a Malvern ZetaSizer. The PDI at an N/P ratios of 1, 2, 3, 4, 6, and 8 was 0.196, 0.206, 0.301, 0.269, 0.304 and 0.332, respectively.

15

20

## 5. Particle size of G series liposomes over a period of 3 months

Tab. 1. Particle size and Zeta potential of liposomes from the G series over a period of 3 months.

| Liposomes | Size (nm) | PDI   | Zeta potential (mV) |
|-----------|-----------|-------|---------------------|
| G12       | 122.3     | 0.212 | 55.1                |
| G14       | 132.7     | 0.198 | 44.8                |
| G16       | 141.5     | 0.183 | 51.7                |
| G18       | 150.1     | 0.226 | 54.7                |

## 6. *In vitro* pDNA transfection

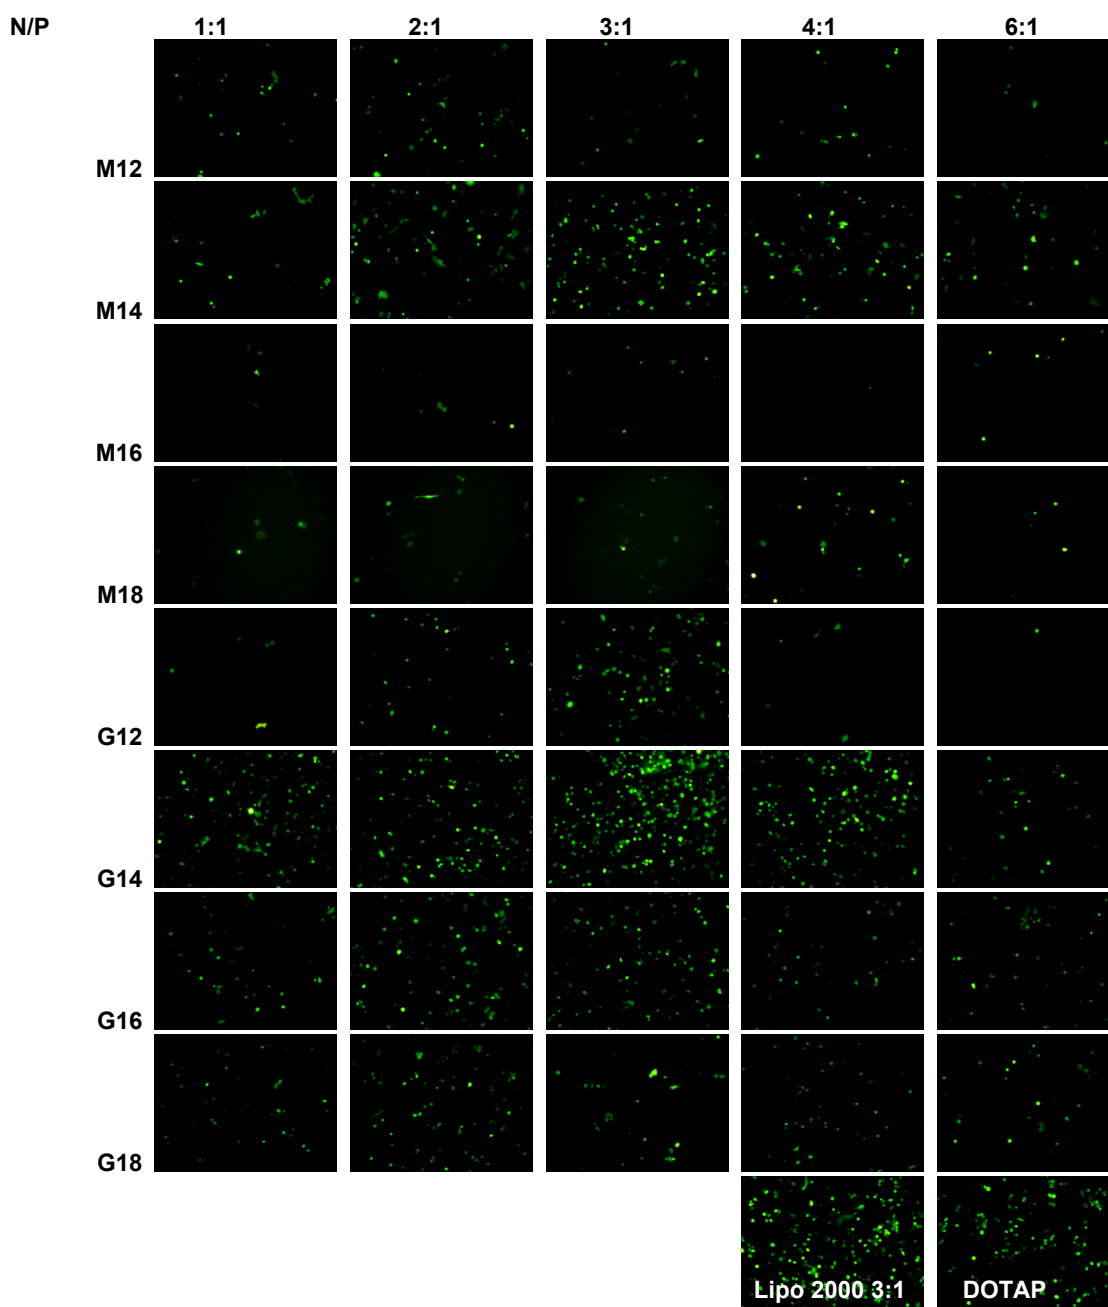

5 Fig. 11. Fluorescence microscopic images (20×10) of GFP gene expression in Hep-2 cells using M and G liposomes at different N/P ratios. As controls, DOTAP and Lipofectamine 2000 were used at the N/P ratio of 3:1. Images were taken 48 h after transfection.

7. *In vitro* pDNA transfection of DOTAP

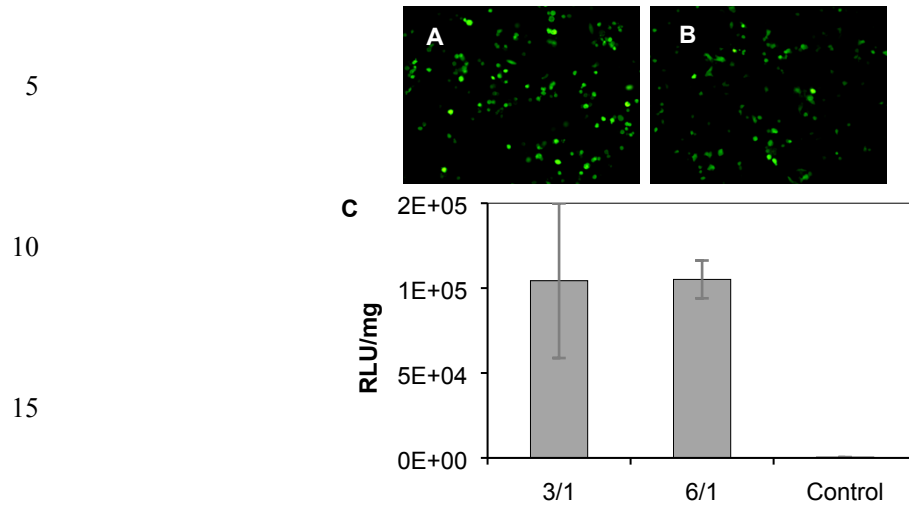

Fig. 12. Gene expression in Hep-2 cells in the presence of DOTAP at the N/P ratios of 3:1 and 6:1. (A, B: Fluorescence 20 microscopic images (20 × 10) of GFP, A: N/P=3:1; B: N/P=6:1; C: Luciferase expression of pGL3.)
